# Supplementary material for: Rapid one-pot synthesis of magnetically separable Fe3O4–Pd nanocatalysts: a highly reusable catalyst for the Suzuki–Miyaura coupling reaction
Source: Royal Society of Chemistry journal article supplement (doi:10.1039/d2dt01422j), 2022-01-01
Supplement: d2dt01422j2.pdf [file d2dt01422j2.pdf]

## Support information for Dalton Transactions

### **Rapid one-pot synthesis of magnetically separable Fe<sub>3</sub>O<sub>4</sub>-Pd nanocatalysts: a highly reusable catalyst for the Suzuki-Miyaura coupling reaction**

Xiangyun Xiao,<sup>†,a</sup> Sunhee Lee,<sup>†,b</sup> Hyeonjong Ma,<sup>c,d</sup> Jiwoong Yang<sup>c,d</sup> Won-Sik Han,<sup>b\*</sup> Taekyung Yu<sup>a\*</sup>

#### **Affiliations:**

<sup>a</sup>Department of Chemical Engineering, College of Engineering, Integrated Engineering Major, Kyung Hee University, Yongin 17104, Korea

<sup>b</sup>Department of Chemistry, Seoul Women's University, 01797, Korea.

<sup>c</sup>Department of Energy Science and Engineering, Daegu Gyeongbuk Institute of Science and Technology (DGIST), Daegu 42988, Republic of Korea

<sup>d</sup>Energy Science and Engineering Research Center, Daegu Gyeongbuk Institute of Science and Technology (DGIST), Daegu 42988, Republic of Korea

<sup>†</sup>These authors contributed equally to this work.

\*To whom correspondence should be addressed. E-mail: [wshan@swu.ac.kr](mailto:wshan@swu.ac.kr) and [tkyu@khu.ac.kr](mailto:tkyu@khu.ac.kr).

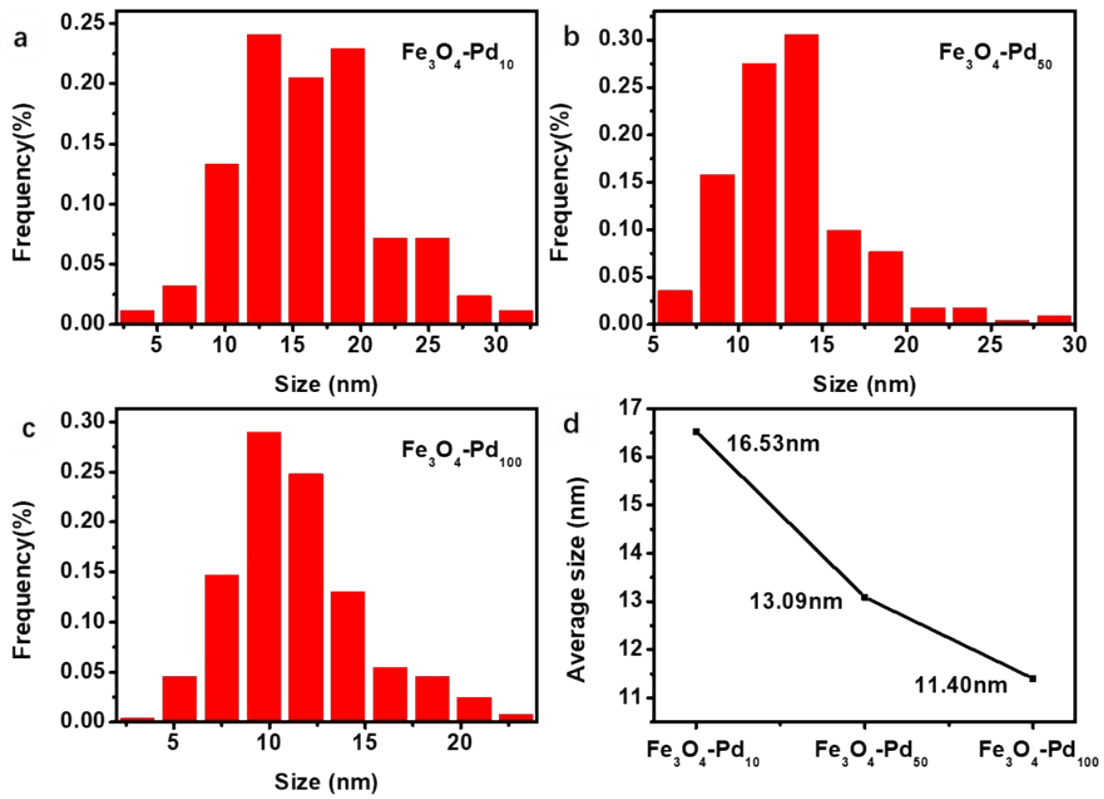

**Fig. S1.** The size distribution of (a,b,c)  $\text{Fe}_3\text{O}_4\text{-Pd}_n$ , and (d) their average size summary graph.

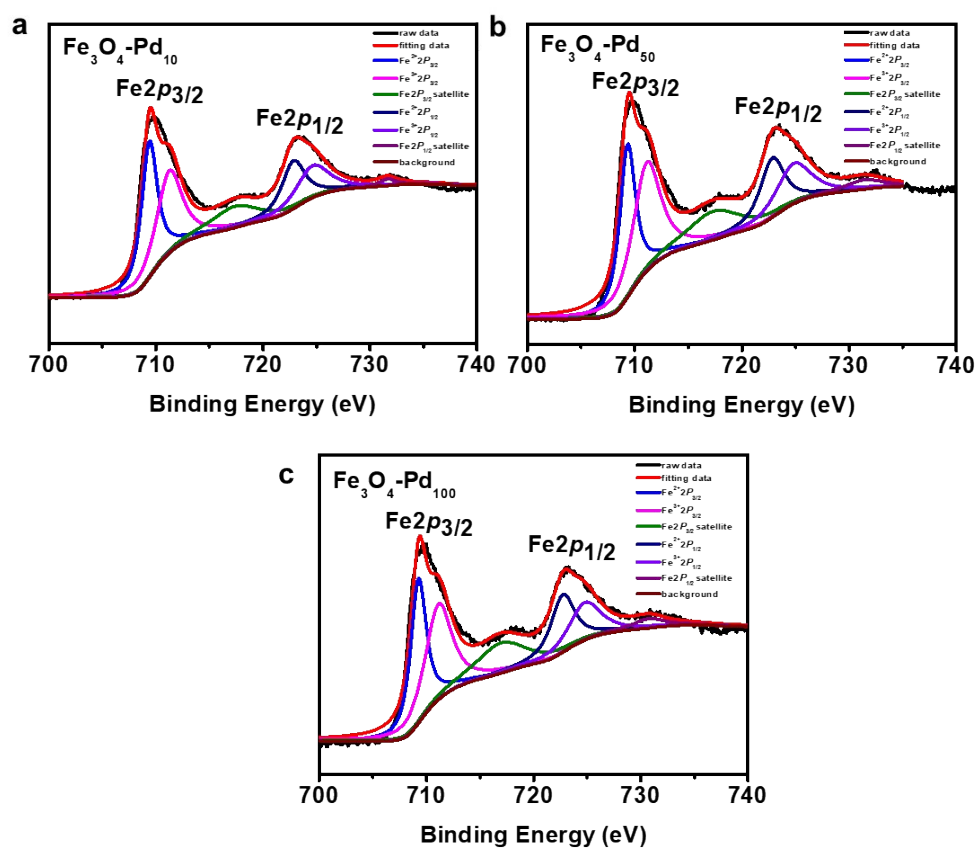

**Fig. S2.** Deconvolution of high-resolution XPS spectra for the Fe2p in the (a) Fe<sub>3</sub>O<sub>4</sub>-Pd<sub>10</sub>, (b) Fe<sub>3</sub>O<sub>4</sub>-Pd<sub>50</sub>, and (c) Fe<sub>3</sub>O<sub>4</sub>-Pd<sub>100</sub>.

1,1'-Biphenyl (Table 2, entry 1)

$^1\text{H NMR}$  (300 MHz,  $\text{CDCl}_3$ ):  $\delta$  7.62-7.58 (m, 4H), 7.48-7.42 (m, 4H), 7.38-7.32 (m, 2H)

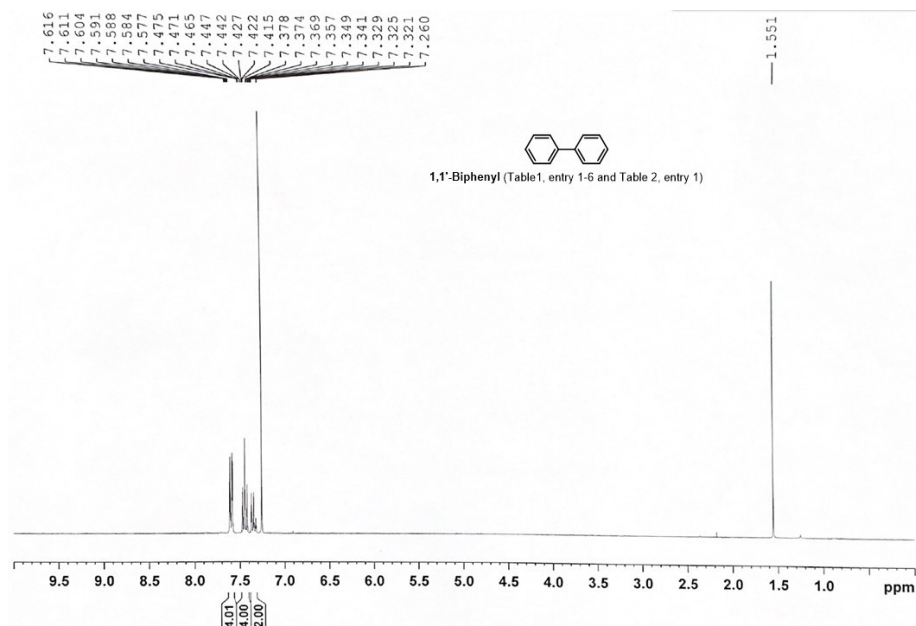

4-Cyano-1,1'-biphenyl (Table 2, entry 2)

$^1\text{H NMR}$  (300 MHz,  $\text{CDCl}_3$ ):  $\delta$  7.76-7.67 (m, 4H), 7.61-7.57 (m, 2H), 7.52-7.40 (m, 3H)

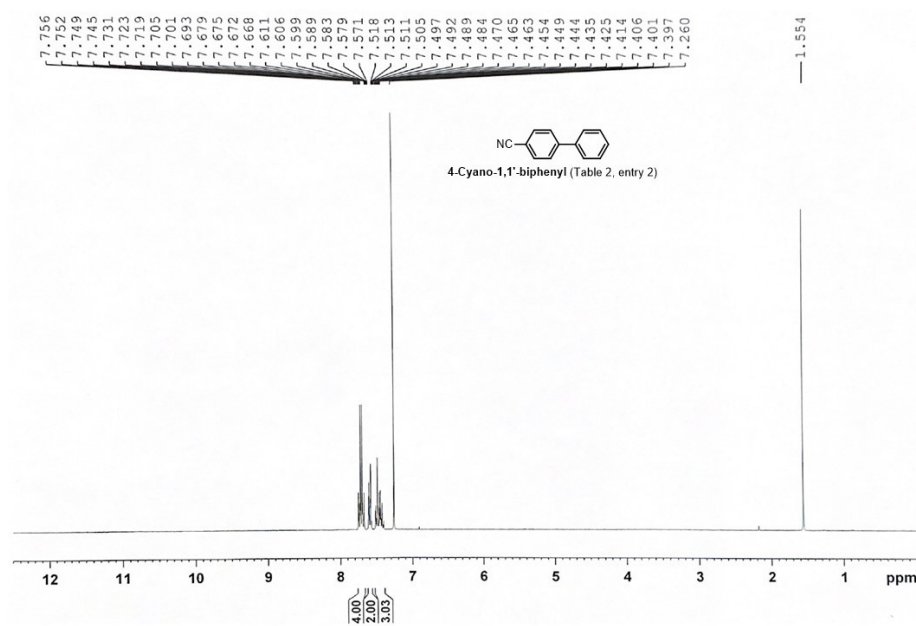

4-Trifluoromethyl-1,1'-biphenyl (Table 2, entry 3)

$^1\text{H NMR}$  (300 MHz,  $\text{CDCl}_3$ ):  $\delta$  7.70 (s, 4H), 7.62-7.58 (m, 2H), 7.51-7.38 (m, 3H)

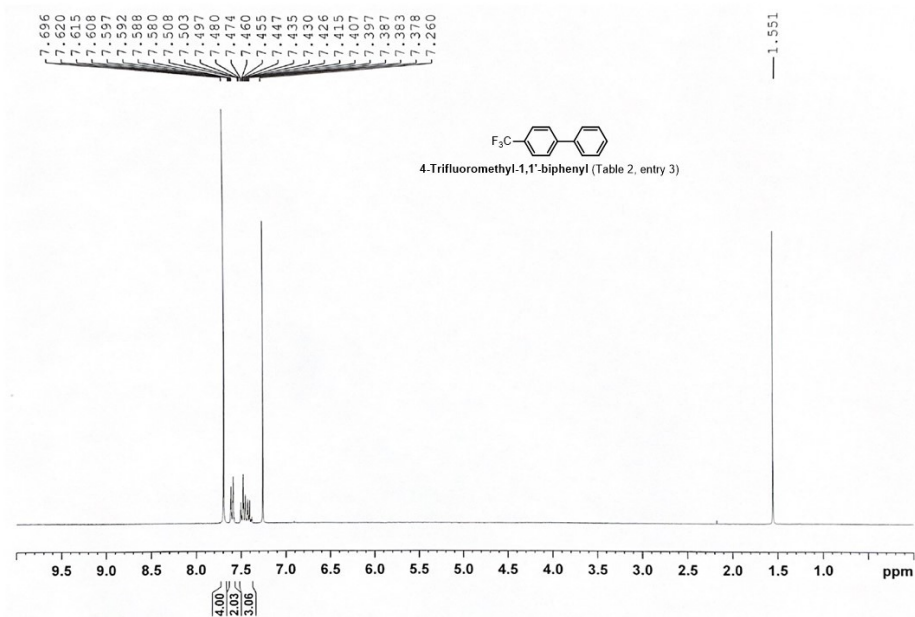

#### 4-Methyl-1,1'-biphenyl (Table 2, entry 4)

$^1\text{H}$  NMR (300 MHz,  $\text{CDCl}_3$ ):  $\delta$  7.60-7.56 (m, 2H), 7.50 (d,  $J = 8.1$  Hz, 2H), 7.43 (t,  $J = 7.5$  Hz, 2H), 7.35-7.30 (m, 1H), 7.26 (d, 2H), 2.40 (s, 3H)

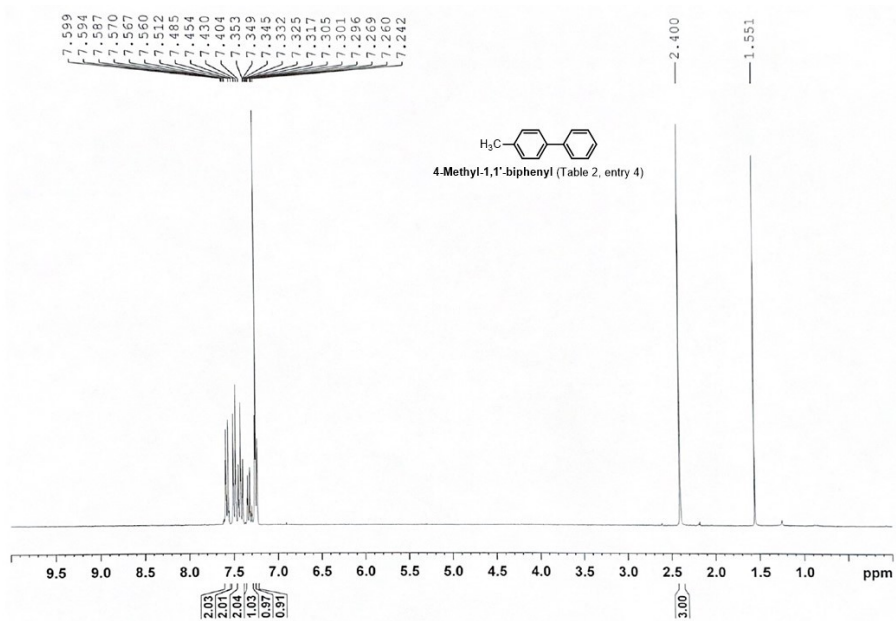

#### 4-Methoxy-1,1'-biphenyl (Table 2, entry 5)

$^1\text{H}$  NMR (300 MHz,  $\text{CDCl}_3$ ):  $\delta$  7.57-7.51 (m, 4H), 7.44-7.39 (m, 2H), 7.33-7.27 (m, 1H), 6.98 (d,  $J = 8.7$  Hz, 2H), 3.86 (s, 3H)

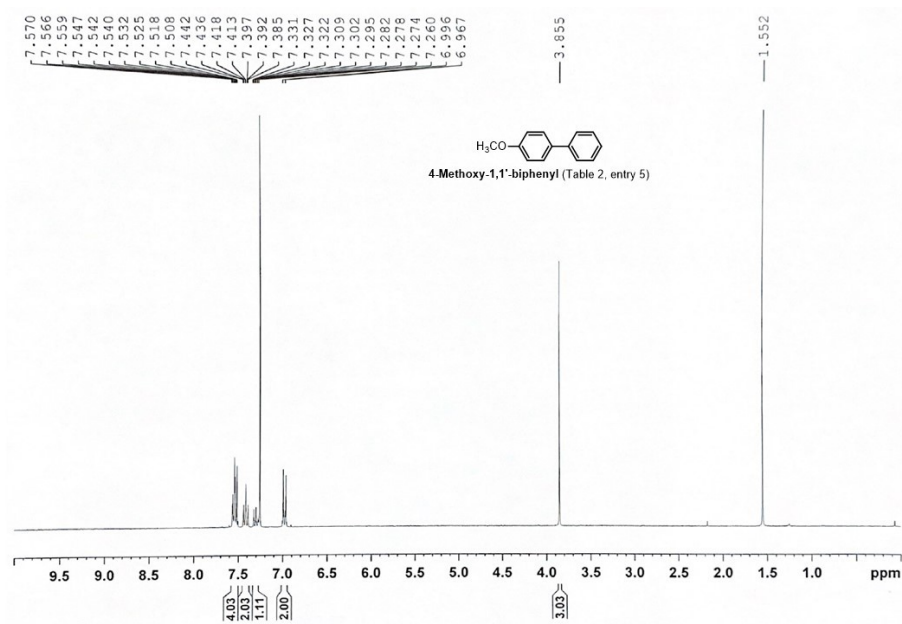

3-Methyl-1,1'-biphenyl (Table 2, entry 6)

$^1\text{H NMR}$  (300 MHz,  $\text{CDCl}_3$ ):  $\delta$  7.61-7.57 (m, 2H), 7.46-7.31 (m, 6H), 7.19-7.16 (m, 1H), 2.43 (s, 3H)

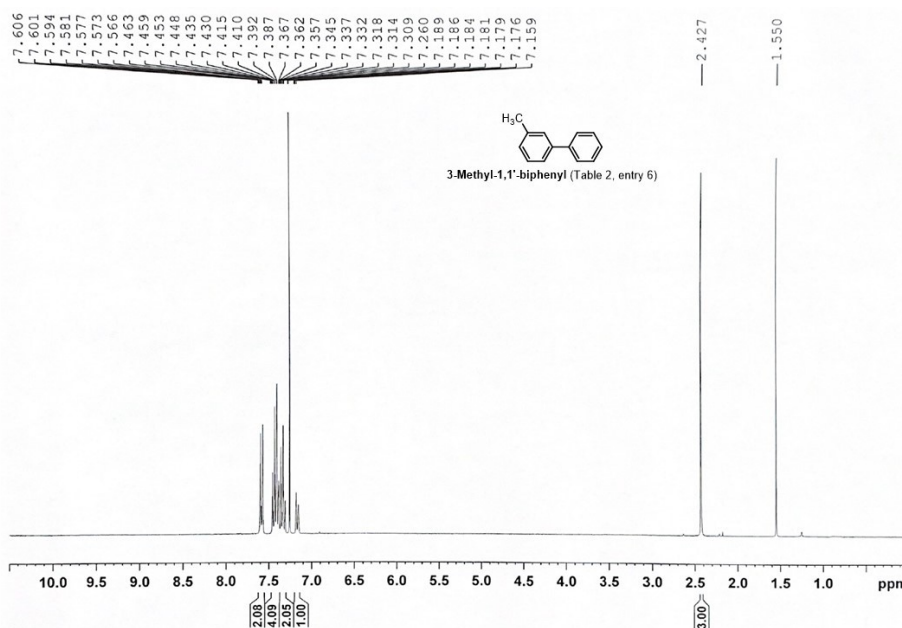

2-Methyl-1,1'-biphenyl (Table 2, entry 7)

$^1\text{H NMR}$  (300 MHz,  $\text{CDCl}_3$ ):  $\delta$  7.45-7.39 (m, 2H), 7.37-7.31 (m, 3H), 7.28-7.22 (m, 4H), 2.28 (s, 3H)

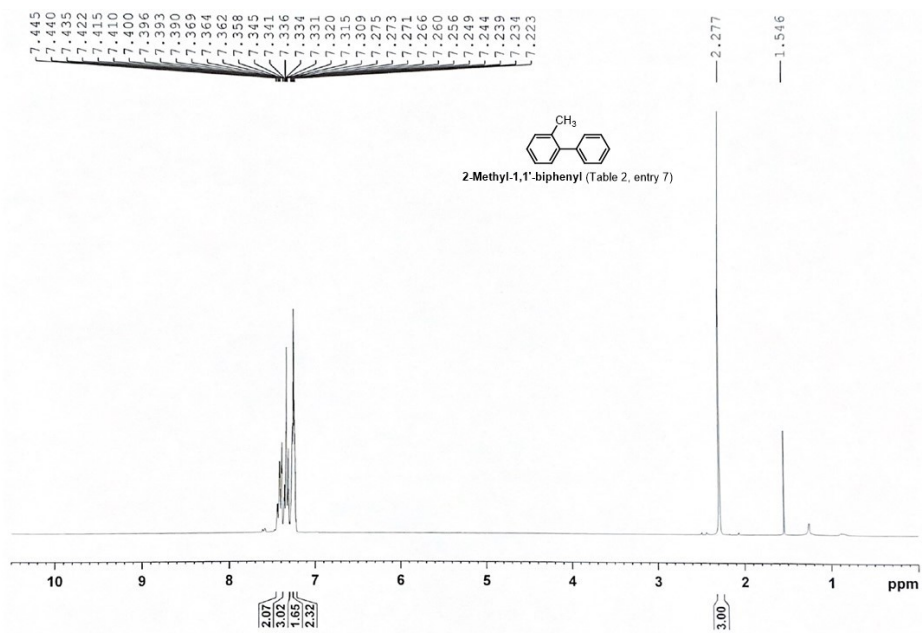

Fig. S3 The  $^1\text{H}$  NMR spectra recorded to identify the products for Table 2.

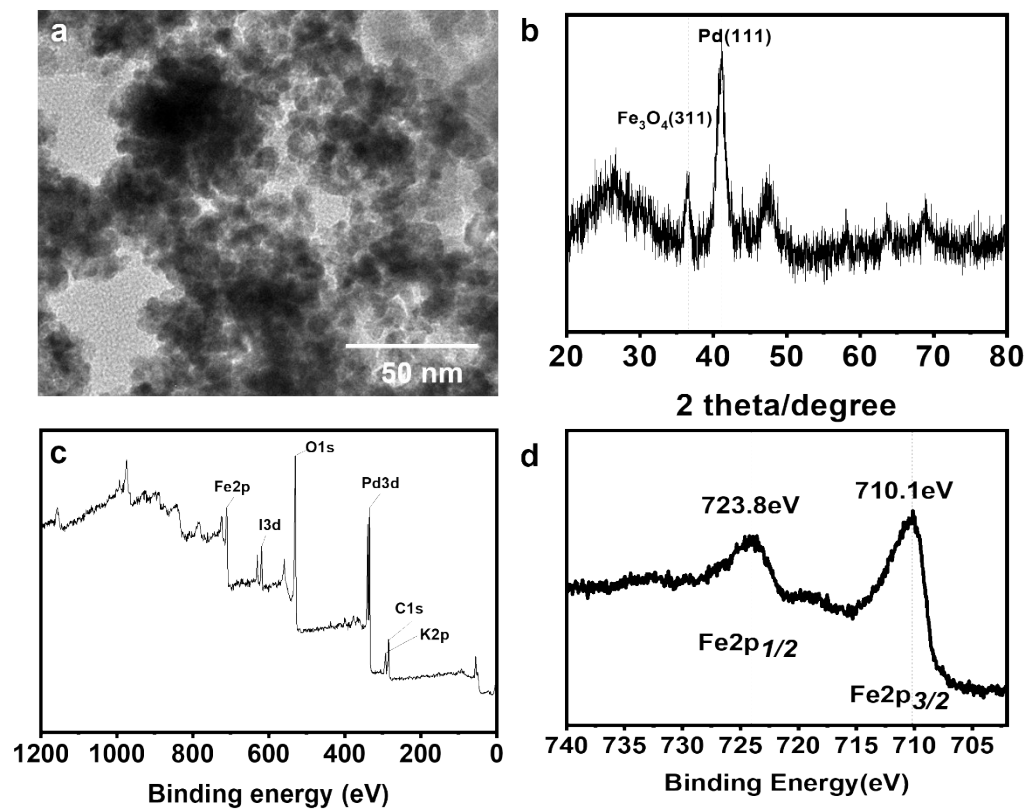

**Fig. S4.** (a) TEM, (b) XRD, (c) a survey XPS spectrum, and (d) fine XPS spectra of Fe 2p analyses of the Fe<sub>3</sub>O<sub>4</sub>-Pd<sub>50</sub> after 10 reaction cycles.



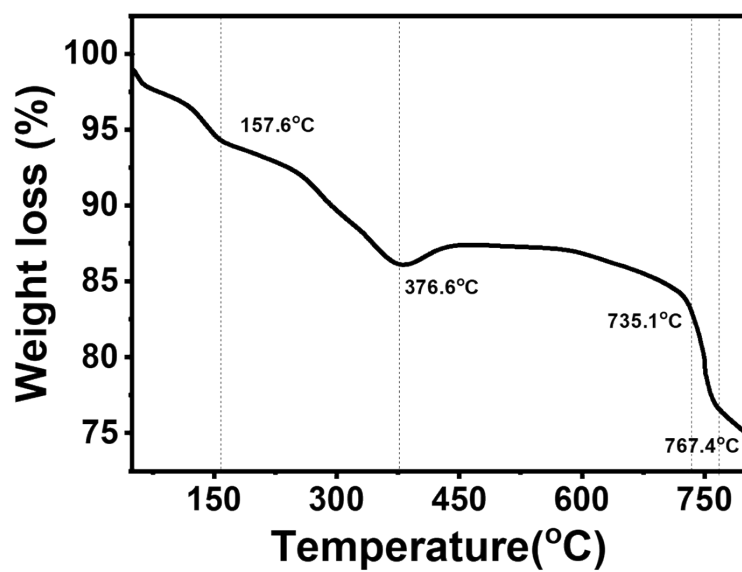

**Fig. S5.** The thermogravimetric analysis (TGA) of Fe<sub>3</sub>O<sub>4</sub>-Pd<sub>50</sub> after 10 cycles. It was carried out at a temperature range of 50 – 800 °C at heating rate of 10°C /min under N<sub>2</sub> atmosphere.

**Table S1.** The Suzuki reactions of aryl halides with phenylboronic acid using the Fe<sub>3</sub>O<sub>4</sub>-Pd<sub>50</sub> catalyst<sup>a</sup>.

| Entry | Aryl halide | Yield(%) <sup>b</sup> |
|-------|-------------|-----------------------|
| 1     | X=I         | 100.0 <sup>c</sup>    |
| 2     | X=Br        | 7.5                   |
| 3     | X=Cl        | /                     |

<sup>a</sup>Isolated yield by column chromatography.

<sup>b</sup>Reaction condition: aryl halide (1.0 mmol), phenylboronic acid (1.5 mmol), K<sub>2</sub>CO<sub>3</sub> (2.0 mmol), ethanol (6.0 mL), Fe<sub>3</sub>O<sub>4</sub>-Pd<sub>50</sub> catalyst (Pd content in Fe<sub>3</sub>O<sub>4</sub>-Pd<sub>50</sub> is: 1.0 mol%; 0.01 mmol), and 60°C, 1h.

**Table S2:** The Suzuki-Miyaura coupling reactions between iodobenzene and phenylboronic acid using the Fe<sub>3</sub>O<sub>4</sub>-Pd<sub>50</sub>, Pd, and Fe<sub>3</sub>O<sub>4</sub> as catalysts.<sup>a</sup>

c1ccc(I)cc1 + c1ccc(cc1)B(O)O
 $\xrightarrow[\text{EtOH, 60 } ^\circ\text{C, 1h}]{\text{K}_2\text{CO}_3, \text{Cat.}}$ 
c1ccc(cc1)-c2ccccc2

| Entry | Cat.                                             | Cat. Mass                    | Yield(%)          |
|-------|--------------------------------------------------|------------------------------|-------------------|
| 1     | Fe <sub>3</sub> O <sub>4</sub> -Pd <sub>50</sub> | Pd content in cat.: 0.01mmol | 99.9 <sup>b</sup> |
| 2     | Pd                                               | 0.01mmol                     | >80 <sup>c</sup>  |
| 3     | Fe <sub>3</sub> O <sub>4</sub>                   | 0.01mmol                     | - <sup>c</sup>    |

<sup>a</sup>Reaction condition: iodobenzene (1.0 mmol), phenylboronic acid (1.5 mmol), K<sub>2</sub>CO<sub>3</sub> (2.0 mmol), ethanol (6.0 mL), catalyst (1mol%), 60°C, 360 rpm, 1 atm, and 1 h.

<sup>b</sup>GC yield.

<sup>c</sup>Isolated yield by column chromatography.

**Table S3:** ICP data of the Fe<sub>3</sub>O<sub>4</sub>-Pd<sub>50</sub> after 10 reaction cycles.

| <b>Name</b>                                                       | <b>Molar fraction of metal (%)</b> |           |                |                    |
|-------------------------------------------------------------------|------------------------------------|-----------|----------------|--------------------|
|                                                                   | <b>Pd</b>                          | <b>Fe</b> | <b>(Fe+Pd)</b> | <b>Fe/Pd ratio</b> |
| Fe <sub>3</sub> O <sub>4</sub> -Pd <sub>50</sub> -after 10 cycles | 25.4                               | 15.6      | 4.1            | 85.45%             |
