# Supplementary figures and images for: Rapid one-pot synthesis of magnetically separable Fe3O4–Pd nanocatalysts: a highly reusable catalyst for the Suzuki–Miyaura coupling reaction
Source: Royal Society of Chemistry journal article supplement (doi:10.1039/d2dt01422j), 2022-01-01

# $\text{Fe}_3\text{O}_4$ -Pd<sub>n</sub> with different Pd ratio-the videos of magnetic responsivity

---

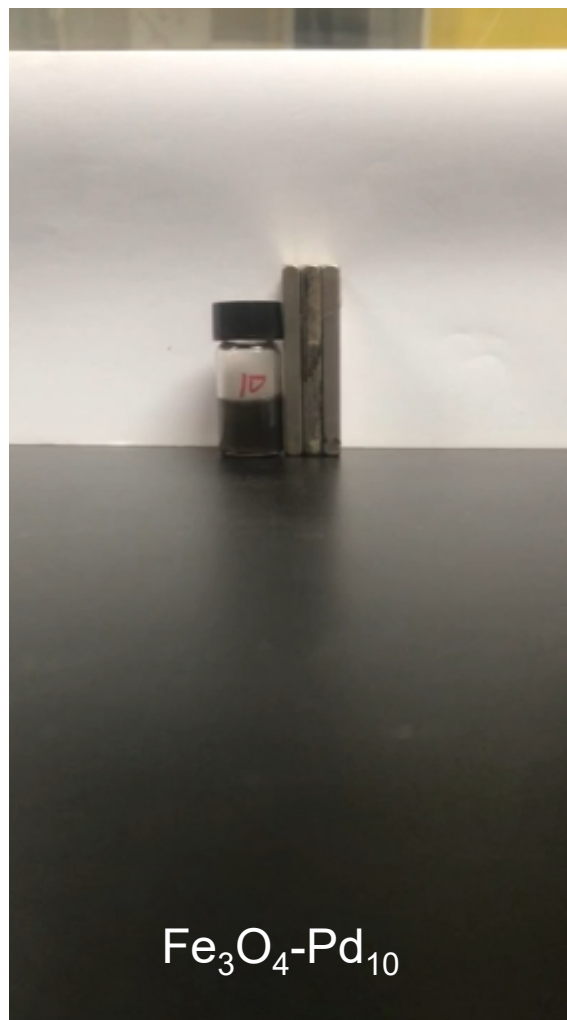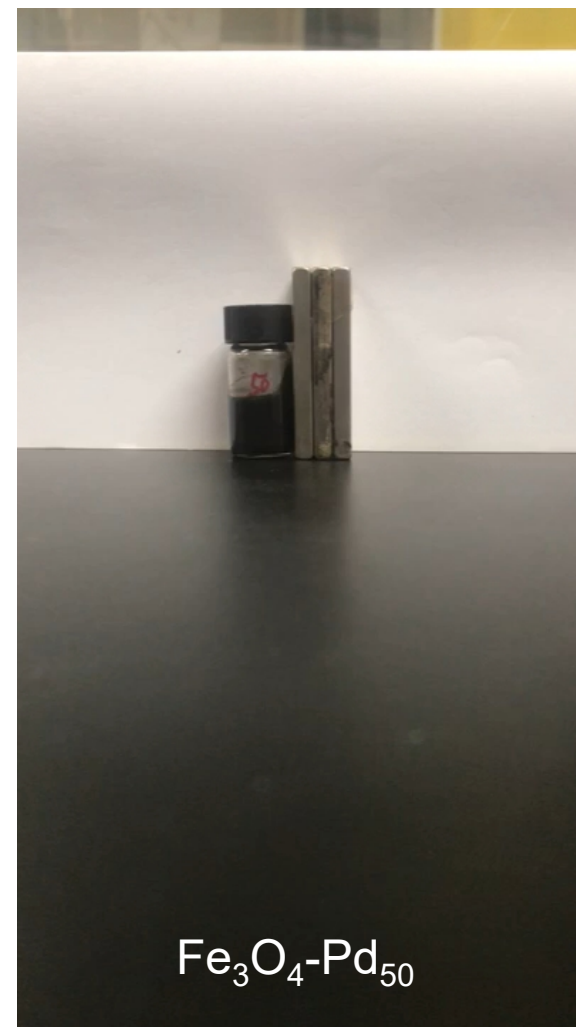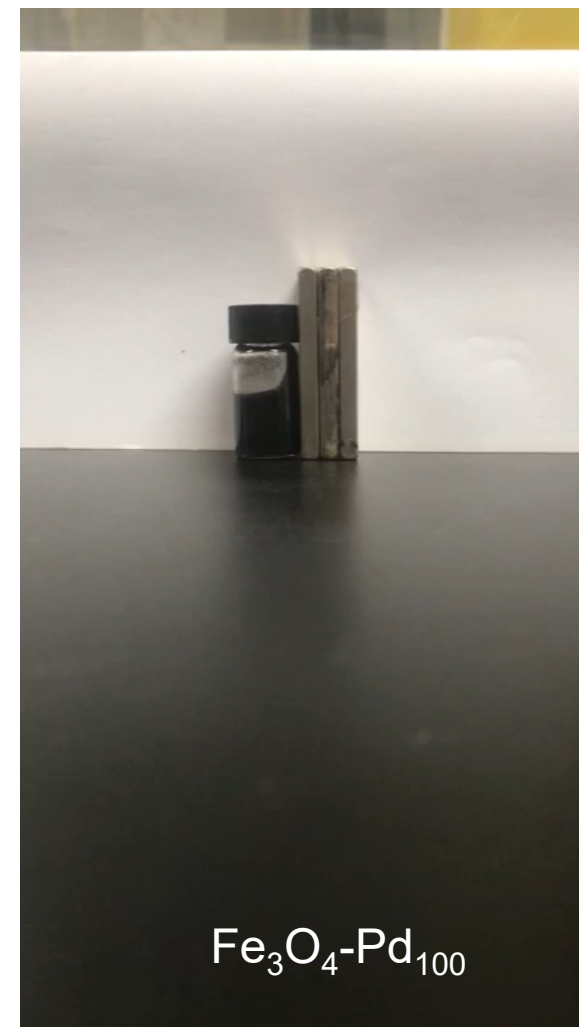

Supplement: d2dt01422j1.pdf [file d2dt01422j1.pdf]
